# Supplementary material for: Prevalence of Bovine Fasciolosis and Its Economic Loss due to Liver Condemnation at Wolaita Sodo Municipal Abattair, Ethiopia
Source: Vet Med Int. 2019 Dec 1;2019:9572373. doi: 10.1155/2019/9572373 (PMC6925672; doi:10.1155/2019/9572373)
Supplement: Supplementary Materials — Supplementary file contains research raw data coded in excel for analysis of the research findings. The raw data includes Ante-mortem and postmortem inspection results: Ante-mortem examination contains different variables such as age, sex, body condition score and origin of animals; and coprological examination. Animals were categorized into three age groups as young (<6 years), adult (6-8 years) and old >8 years. Cattle with body condition score of < 4 were considered as poor, body condition score of 5 to 6 considered as medium and those with body condition scores above 6 were considered as good. These all were variables to determine the risk factors for the prevalence of bovine fasciolosis. Coprological examinations were also performed to detect Fasciola eggs. Animal with fasciola egg considered as positive, animal without fasciola egg considered as Negative. At post mortem examination Liver parenchyma and bile ducts were examined for the presence of immature and adult Fasciola parasites respectively; animal with the presence of fascila parasite considered as positive result and wirhout fasciola parasite considered as negative result. Species were also identified as F. hepatica and F. gigantica. [file 9572373.f1.xlsx]

## Sheet: Sheet1
origin	sex	age	body con	Cop result	PM result	spp of Fas	month
1	1	2	3	1	1	2	1
1	1	2	3	0	0	0	1		age		origin		result		spp of fasciola
1	1	2	3	0	0	0	1		young (<6yr) = 1		Gofa = 1		negetive = 0		gigantica = 2
1	1	2	3	0	0	0	1		adult (6-8yr) = 2		Humbo = 2		positive = 1		hepatica = 1
1	1	2	3	0	0	0	1		old (>8) =3		Boreda = 3				negetive = 0
2	1	1	3	0	0	0	1
2	1	2	3	0	0	0	1
2	1	2	3	0	0	0	1		sex
1	1	2	3	0	0	0	1		male = 1
1	2	3	3	1	1	2	1		female= 2
1	1	2	3	0	0	0	1							2019-11-01
3	1	2	3	0	0	0	1		BC					2019-12-02
2	1	2	3	0	0	0	1		poor = 1					2019-01-03
2	1	2	3	0	0	0	1		med = 2					2019-02-04
2	1	1	1	0	0	0	1		Good = 3
3	1	2	1	1	1	1	1
3	2	3	2	0	0	0	1
1	1	2	2	0	0	0	1
1	1	2	2	0	0	0	1
1	1	2	3	0	0	0	1
3	1	2	3	0	0	0	1
3	1	3	3	0	0	0	1
2	1	2	3	0	0	0	1
2	1	2	3	0	0	0	1
2	2	3	3	1	1	2	1
1	1	2	3	0	0	0	1
1	1	2	3	0	0	0	1
1	1	2	3	1	1	2	1
1	1	2	3	0	0	0	1
2	1	2	3	0	0	0	1
2	1	2	3	0	0	0	1
3	1	2	3	0	0	0	1
3	1	1	1	0	0	0	1
2	1	2	3	0	0	0	1
2	1	1	3	0	0	0	1
1	1	2	2	0	0	0	1
1	2	2	2	0	0	0	1
1	1	2	2	0	0	0	1
3	1	1	1	0	0	0	1
2	1	2	1	0	0	0	1
2	1	2	3	0	0	0	1
1	1	3	3	0	1	1	1
1	1	2	3	0	0	0	1
1	1	2	3	0	1	1	1
1	1	2	3	0	0	0	1
1	1	2	3	1	1	1	1
3	1	2	3	0	0	0	1
3	1	2	3	0	0	0	1
2	1	1	3	0	0	0	1
2	1	2	3	0	0	0	1
3	1	2	3	0	0	0	1
3	1	2	3	0	0	0	1
2	2	2	3	1	1	1	1
2	1	2	3	0	0	0	1
3	1	2	3	0	0	0	1
3	1	1	3	0	0	0	1
2	1	2	3	0	0	0	1
2	1	2	3	0	0	0	1
1	1	2	1	1	1	1	1
1	1	2	1	0	0	0	1
1	1	2	3	0	0	0	1
1	1	2	3	0	0	0	1
1	2	3	1	1	1	1	2
3	1	2	3	0	0	0	2
3	1	2	2	0	0	0	2
3	1	2	2	0	0	0	2
3	1	1	2	0	0	0	2
2	1	3	1	0	0	0	2
2	1	3	1	0	0	0	2
3	1	2	3	0	0	0	2
3	1	2	3	0	0	0	2
3	1	2	3	0	0	0	2
3	2	2	3	0	0	0	2
2	1	2	3	0	0	0	2
1	1	2	3	1	1	1	2
1	1	2	3	0	0	0	2
1	1	2	3	0	0	0	2
1	2	2	1	1	1	1	2
1	1	2	3	0	0	0	2
1	1	1	3	0	0	0	2
1	1	2	3	0	0	0	2
2	1	1	3	0	0	0	2
2	1	2	3	0	0	0	2
2	1	2	3	0	0	0	2
2	1	1	3	0	0	0	2
1	2	3	1	1	1	1	2
1	1	2	3	0	0	0	2
1	1	2	3	0	0	0	2
1	1	2	3	0	0	0	2
1	1	1	1	0	0	0	2
1	1	2	3	0	0	0	2
1	1	2	3	1	1	1	2
3	1	2	1	1	1	1	2
3	1	2	1	1	1	1	2
2	1	2	3	0	0	0	2
2	1	2	3	0	0	0	2
2	1	2	3	0	0	0	2
1	1	3	3	0	0	0	2
1	1	2	3	0	0	0	2
1	1	2	3	0	0	0	2
1	1	2	2	0	0	0	2
1	2	1	1	0	1	1	2
3	1	2	3	0	0	0	2
2	1	2	3	0	0	0	2
2	1	2	3	0	0	0	2
2	1	3	3	0	0	0	2
3	1	2	3	0	0	0	2
3	1	2	3	0	0	0	2
3	1	1	3	0	0	0	2
1	1	2	2	1	1	1	2
1	2	2	2	0	0	0	2
1	2	3	2	0	0	0	2
1	2	3	2	1	1	1	2
3	1	2	2	0	0	0	2
3	1	2	1	0	0	0	2
1	1	2	1	0	0	0	2
1	1	2	3	0	0	0	2
1	2	1	3	0	0	0	2
1	1	2	3	1	1	1	2
1	1	2	3	0	0	0	2
1	1	2	3	0	0	0	2
3	1	2	3	0	0	0	2
3	1	2	3	0	0	0	2
3	1	3	1	0	0	0	2
2	2	2	1	1	1	2	3
1	1	2	3	0	0	0	3
1	1	1	3	0	0	0	3
1	1	2	3	0	0	0	3
1	1	2	3	0	1	1	3
1	1	2	3	0	0	0	3
1	1	2	3	0	0	0	3
1	1	3	3	0	1	2	3
3	2	2	3	0	1	1	3
3	1	1	3	0	0	0	3
1	1	2	1	0	0	0	3
1	1	2	2	0	0	0	3
1	1	2	1	0	0	0	3
2	1	2	3	0	0	0	3
2	1	2	3	1	1	1	3
1	1	3	3	1	1	1	3
1	2	2	3	0	0	0	3
1	1	2	3	0	0	0	3
1	1	2	3	0	0	0	3
1	1	2	3	1	1	2	3
1	1	2	3	0	0	0	3
1	1	2	3	0	0	0	3
1	1	2	3	0	0	0	3
1	1	3	3	0	0	0	3
1	2	2	3	1	1	1	3
1	1	2	1	0	0	0	3
1	1	2	1	0	0	0	3
3	1	2	2	0	0	0	3
3	1	3	1	0	0	0	3
2	2	2	3	0	0	0	3
1	1	2	3	0	0	0	3
2	1	2	3	0	0	0	3
2	1	2	3	0	0	0	3
1	1	1	3	0	0	0	3
3	1	2	3	1	1	1	3
3	1	2	3	0	0	0	3
1	1	2	3	0	0	0	3
1	1	3	1	0	0	0	3
1	2	2	3	0	0	0	3
2	1	2	3	0	0	0	3
2	1	2	3	0	0	0	3
2	1	2	3	0	0	0	3
2	1	2	3	0	0	0	3
2	1	2	3	1	1	1	3
2	1	2	2	0	0	0	3
2	1	2	2	0	0	0	3
2	1	2	2	0	0	0	3
2	1	3	1	0	0	0	3
2	2	2	1	1	1	1	3
2	1	2	3	1	1	2	3
2	1	2	3	0	0	0	3
2	1	2	3	0	0	0	3
1	1	2	3	0	0	0	3
1	1	2	3	0	0	0	3
1	1	2	3	0	0	0	3
1	1	2	3	0	0	0	3
1	1	1	3	0	0	0	3
1	1	3	3	0	0	0	3
1	2	3	3	1	1	2	3
1	2	2	3	0	0	0	3
1	1	2	3	0	0	0	3
1	1	2	3	0	0	0	3
3	1	2	3	1	1	1	4
3	1	2	3	1	1	1	4
2	1	2	3	0	0	0	4
2	1	2	3	0	0	0	4
2	1	2	3	0	0	0	4
3	1	2	3	1	1	1	4
3	1	3	1	0	0	0	4
1	1	2	3	0	0	0	4
1	1	2	3	0	0	0	4
1	1	2	3	1	1	1	4
3	1	1	3	0	0	0	4
3	1	2	3	0	0	0	4
2	1	2	3	0	0	0	4
2	1	2	3	0	0	0	4
3	1	2	3	0	0	0	4
3	1	1	1	0	0	0	4
3	2	2	3	1	1	2	4
2	1	2	3	0	0	0	4
2	1	2	3	0	0	0	4
1	1	2	3	0	0	0	4
1	1	2	2	0	0	0	4
3	1	2	3	1	1	1	4
2	1	3	3	0	0	0	4
2	1	2	2	0	0	0	4
2	1	2	1	0	0	0	4
2	1	2	3	0	0	0	4
3	1	2	3	1	1	2	4
3	1	1	1	0	0	0	4
3	1	2	3	0	0	0	4
3	1	3	3	0	0	0	4
2	2	2	3	0	0	0	4
2	2	2	3	0	1	1	4
2	1	2	3	0	0	0	4
2	1	2	3	0	0	0	4
2	1	3	1	0	0	0	4
2	1	2	3	1	1	1	4
1	1	2	3	0	0	0	4
1	1	2	2	0	0	0	4
1	1	1	2	0	0	0	4
1	1	1	2	0	0	0	4
1	1	2	3	0	0	0	4
1	1	3	1	1	1	2	4
3	2	3	1	0	0	0	4
3	1	2	3	0	0	0	4
3	1	2	3	0	0	0	4
2	1	2	3	0	1	2	4
2	1	2	3	0	0	0	4
3	1	2	3	0	0	0	4
3	1	3	3	1	1	1	4
1	2	2	1	0	1	1	4
1	1	2	3	0	0	0	4
1	1	2	3	0	0	0	4
1	1	2	3	0	0	0	4
1	1	2	3	1	1	2	4
2	1	2	3	0	0	0	4
2	1	2	3	0	0	0	4
2	1	3	1	1	1	1	4
3	1	2	3	0	0	0	4
3	1	2	2	0	0	0	4
3	1	2	3	0	0	0	4
2	1	1	3	1	1	1	4
